# Supplementary material for: Stress responses of the oil-producing green microalga Botryococcus braunii Race B
Source: PeerJ. 2016 Dec 6;4:e2748. doi: 10.7717/peerj.2748 (PMC5144741; doi:10.7717/peerj.2748)
Supplement: Supplemental Information 1 — Control (A) 100 mM NaCl (B) 120 mM NaHCO3 (C) 3 mM SA (D) 10 µM MeJA (E) and 4.33 mM acetic acid (F). Data represent the mean ± SE of at least three repetitions. Statistical analysis was done by Two-way ANOVA α = 0.05, comparisons were against control P value < 0.0001 ∗∗∗∗, P value 0.0001 ∗∗∗, P value 0.0023 ∗∗. [file peerj-04-2748-s001.xlsx]

## Sheet: Hoja1
Treatment	Replicate	% ROS positive colonies
control 10 min	R1	8.54701
control 10 min	R2	9.4017
control 10 min	R3	9.6385
control 60 min	R1	15.179
control 60 min	R2	9.6386
control 60 min	R3	8.983
control 120 min	R1	19.008
control 120 min	R2	10.345
control 120 min	R3	10.496
50.0 mM NaCl 10.0 min	R1	37.86
50.0 mM NaCl 10.0 min	R2	56.12
50.0 mM NaCl 10.0 min	R3	50
50.0 mM NaCl 60.0 min	R1	32.407
50.0 mM NaCl 60.0 min	R2	34.41
50.0 mM NaCl 60.0 min	R3	46.66
50.0 mM NaCl 120.0 min	R1	25.22
50.0 mM NaCl 120.0 min	R2	40.65
50.0 mM NaCl 120.0 min	R3	37.57
100.0 mM NaCl 10.0 min	R1	74.03
100.0 mM NaCl 10.0 min	R2	45.79
100.0 mM NaCl 10.0 min	R3	62.5
100.0 mM NaCl 60.0 min	R1	66.66
100.0 mM NaCl 60.0 min	R2	76.11
100.0 mM NaCl 60.0 min	R3	70.94
100.0 mM NaCl 120.0 min	R1	44.95
100.0 mM NaCl 120.0 min	R2	30.68
100.0 mM NaCl 120.0 min	R3	58.84
200.0 mM NaCl 10.0 min	R1	51.32
200.0 mM NaCl 10.0 min	R2	36.55
200.0 mM NaCl 10.0 min	R3	59.8
200.0 mM NaCl 60.0 min	R1	44.23
200.0 mM NaCl 60.0 min	R2	41.53
200.0 mM NaCl 60.0 min	R3	49.88
200.0 mM NaCl 120.0 min	R1	38.59
200.0 mM NaCl 120.0 min	R2	36.2
200.0 mM NaCl 120.0 min	R3	59.88
1.0% NaHCO3 10.0 min	R1	14.14
1.0% NaHCO3 10.0 min	R2	21.35
1.0% NaHCO3 10.0 min	R3	26.143
1.0% NaHCO3 60.0 min	R1	36.264
1.0% NaHCO3 60.0 min	R2	38.323
1.0% NaHCO3 60.0 min	R3	47.826
1.0% NaHCO3 120.0 min	R1	38.71
1.0% NaHCO3 120.0 min	R2	21.714
1.0% NaHCO3 120.0 min	R3	33.628
2.0% NaHCO3 10.0 min	R1	16.667
2.0% NaHCO3 10.0 min	R2	16.327
2.0% NaHCO3 10.0 min	R3	19.44
2.0% NaHCO3 60.0 min	R1	47.436
2.0% NaHCO3 60.0 min	R2	33.696
2.0% NaHCO3 60.0 min	R3	24.07
2.0% NaHCO3 120.0 min	R1	43.03
2.0% NaHCO3 120.0 min	R2	46.45
2.0% NaHCO3 120.0 min	R3	19.44
3.0% NaHCO3 10.0 min	R1	21.31
3.0% NaHCO3 10.0 min	R2	14.815
3.0% NaHCO3 10.0 min	R3	32.927
3.0% NaHCO3 60.0 min	R1	28.571
3.0% NaHCO3 60.0 min	R2	25.701
3.0% NaHCO3 60.0 min	R3	32.92
3.0% NaHCO3 120.0 min	R1	22.388
3.0% NaHCO3 120.0 min	R2	27.05
3.0% NaHCO3 120.0 min	R3	22.619
1.5 mM Salycilic acid 10.0 min	R1	8.7719
1.5 mM Salycilic acid 10.0 min	R2	39.224
1.5 mM Salycilic acid 10.0 min	R3	28.47
1.5 mM Salycilic acid 60.0 min	R1	47.706
1.5 mM Salycilic acid 60.0 min	R2	19.005
1.5 mM Salycilic acid 60.0 min	R3	19.588
1.5 mM Salycilic acid 120.0 min	R1	46.154
1.5 mM Salycilic acid 120.0 min	R2	20.313
1.5 mM Salycilic acid 120.0 min	R3	26.55
3.0 mM Salycilic acid 10.0 min	R1	24.107
3.0 mM Salycilic acid 10.0 min	R2	25.101
3.0 mM Salycilic acid 10.0 min	R3	25.029
3.0 mM Salycilic acid 60.0 min	R1	57.265
3.0 mM Salycilic acid 60.0 min	R2	52.49
3.0 mM Salycilic acid 60.0 min	R3	51.455
3.0 mM Salycilic acid 120.0 min	R1	56.757
3.0 mM Salycilic acid 120.0 min	R2	46.354
3.0 mM Salycilic acid 120.0 min	R3	56.554
6.0 mM Salycilic acid 10.0 min	R1	14.634
6.0 mM Salycilic acid 10.0 min	R2	15.029
6.0 mM Salycilic acid 10.0 min	R3	15.126
6.0 mM Salycilic acid 60.0 min	R1	34.426
6.0 mM Salycilic acid 60.0 min	R2	29.064
6.0 mM Salycilic acid 60.0 min	R3	31.23
6.0 mM Salycilic acid 120.0 min	R1	30.952
6.0 mM Salycilic acid 120.0 min	R2	22.404
6.0 mM Salycilic acid 120.0 min	R3	26.554
10.0 mM MeJA 10.0 min	R1	45.918
10.0 mM MeJA 10.0 min	R2	38.739
10.0 mM MeJA 10.0 min	R3	55.152
10.0 mM MeJA 60.0 min	R1	57.447
10.0 mM MeJA 60.0 min	R2	44.342
10.0 mM MeJA 60.0 min	R3	56.989
10.0 mM MeJA 120.0 min	R1	25
10.0 mM MeJA 120.0 min	R2	30.579
10.0 mM MeJA 120.0 min	R3	39.13
20.0 mM MeJA 10.0 min	R1	20.253
20.0 mM MeJA 10.0 min	R2	22.807
20.0 mM MeJA 10.0 min	R3	61.379
20.0 mM MeJA 60.0 min	R1	29.63
20.0 mM MeJA 60.0 min	R2	22.034
20.0 mM MeJA 60.0 min	R3	47.525
20.0 mM MeJA 120.0 min	R1	27.679
20.0 mM MeJA 120.0 min	R2	25.664
20.0 mM MeJA 120.0 min	R3	32.85
30.0 mM MeJA 10.0 min	R1	25.843
30.0 mM MeJA 10.0 min	R2	15.455
30.0 mM MeJA 10.0 min	R3	30.36
30.0 mM MeJA 60.0 min	R1	22.807
30.0 mM MeJA 60.0 min	R2	23.301
30.0 mM MeJA 60.0 min	R3	24.156
30.0 mM MeJA 120.0 min	R1	28.431
30.0 mM MeJA 120.0 min	R2	19.626
30.0 mM MeJA 120.0 min	R3	20.411
1.09 mM acetic acid 10.0 min	R1	30
1.09 mM acetic acid 10.0 min	R2	25.743
1.09 mM acetic acid 10.0 min	R3	28.125
1.09 mM acetic acid 60.0 min	R1	34.862
1.09 mM acetic acid 60.0 min	R2	29.167
1.09 mM acetic acid 60.0 min	R3	18.487
1.09 mM acetic acid 120.0 min	R1	24.731
1.09 mM acetic acid 120.0 min	R2	25
1.09 mM acetic acid 120.0 min	R3	19.868
2.18 mM acetic acid 10.0 min	R1	25.62
2.18 mM acetic acid 10.0 min	R2	32.558
2.18 mM acetic acid 10.0 min	R3	22.22
2.18 mM acetic acid 60.0 min	R1	46.018
2.18 mM acetic acid 60.0 min	R2	15.625
2.18 mM acetic acid 60.0 min	R3	26.126
2.18 mM acetic acid 120.0 min	R1	23.077
2.18 mM acetic acid 120.0 min	R2	25.287
2.18 mM acetic acid 120.0 min	R3	24.603
4.33 mM acetic acid 10.0 min	R1	25.49
4.33 mM acetic acid 10.0 min	R2	32.979
4.33 mM acetic acid 10.0 min	R3	38.636
4.33 mM acetic acid 60.0 min	R1	81.513
4.33 mM acetic acid 60.0 min	R2	61.538
4.33 mM acetic acid 60.0 min	R3	44.776
4.33 mM acetic acid 120.0 min	R1	36.449
4.33 mM acetic acid 120.0 min	R2	31.169
4.33 mM acetic acid 120.0 min	R3	44.231
