# Supplementary material for: Stress responses of the oil-producing green microalga Botryococcus braunii Race B
Source: PeerJ. 2016 Dec 6;4:e2748. doi: 10.7717/peerj.2748 (PMC5144741; doi:10.7717/peerj.2748)
Supplement: Supplemental Information 3 — DAD1, defender against death; MBF1A, multiprotein-bridging factor; CLPP2, nuclear-encoded CLP protease P7; ARM, ARM repeat superfamily protein; FER2, ferritin 2; PRB1, basic pathogenesis-related protein 1; WD40, transducing/WD40 repeat-like super family protein, and APX6, ascorbate peroxidase 6. [file peerj-04-2748-s003.xlsx]

## Sheet: Hoja1
Treatment	FPKM per day
DAD1 day 0	59.614
DAD1 day 3	69.988
DAD1 day 7	81.78
DAD1 day 14	77.097
DAD1 day 21	42.867
DAD1 day 28	57.476
MBF1A day 0	41.821
MBF1A day 3	51.009
MBF1A day 7	48.067
MBF1A day 14	51.788
MBF1A day 21	56.986
MBF1A day 28	43.937
CLPP2 day 0	16.06
CLPP2 day 3	18.467
CLPP2 day 7	18.413
CLPP2 day 14	19.206
CLPP2 day 21	14.712
CLPP2 day 28	17.721
SAD2 day 0	10.666
SAD2 day 3	13.154
SAD2 day 7	14.533
SAD2 day 14	11.902
SAD2 day 21	11.14
SAD2 day 28	10.871
FRI2 day 0	30.481
FRI2 day 3	55.308
FRI2 day 7	49.231
FRI2 day 14	49.447
FRI2 day 21	35.572
FRI2 day 28	39.377
PBR1 day 0	4.776
PBR1 day 3	7.657
PBR1 day 7	7.005
PBR1 day 14	7.9
PBR1 day 21	2.284
PBR1 day 28	4.125
WDR5A day 0	21.651
WDR5A day 3	19.716
WDR5A day 7	19.808
WDR5A day 14	16.531
WDR5A day 21	18.495
WDR5A day 28	16.86
APX6 day 0	1.995
APX6 day 3	3.388
APX6 day 7	3.743
APX6 day 14	3.009
APX6 day 21	2.918
APX6 day 28	2.895
