# Supplementary material for: Stress responses of the oil-producing green microalga Botryococcus braunii Race B
Source: PeerJ. 2016 Dec 6;4:e2748. doi: 10.7717/peerj.2748 (PMC5144741; doi:10.7717/peerj.2748)
Supplement: Table S1 — Show the defense and stress genes from A. thaliana which were identified and used for BLAST against the C. reinhardtii v 5.3 genome. [file peerj-04-2748-s006.xlsx]

## Sheet: DefGenesAth
AT1G01560.2 - MAP kinase 11
AT1G01680.1 - plant U-box 54
AT1G02750.1 - Drought-responsive family protein
AT1G02820.1 - Late embryogenesis abundant 3 (LEA3) family protein
AT1G04520.1 - plasmodesmata-located protein 2
AT1G05340.1 - (M=5) PTHR31568:SF17 - EXPRESSED PROTEIN
AT1G07880.2 - Protein kinase superfamily protein
AT1G07890.3 - ascorbate peroxidase 1
AT1G07890.3 - ascorbate peroxidase 1
AT1G09740.1 - Adenine nucleotide alpha hydrolases-like superfamily protein
AT1G10090.1 - Early-responsive to dehydration stress protein (ERD4)
AT1G10210.1 - mitogen-activated protein kinase 1
AT1G11360.1 - Adenine nucleotide alpha hydrolases-like superfamily protein
AT1G11960.1 - ERD (early-responsive to dehydration stress) family protein
AT1G12270.1 - stress-inducible protein, putative
AT1G12440.1 - A20/AN1-like zinc finger family protein
AT1G14540.1 - Peroxidase superfamily protein
AT1G14550.1 - Peroxidase superfamily protein
AT1G16760.1 - Protein kinase protein with adenine nucleotide alpha hydrolases-like domain
AT1G17540.1 - Protein kinase protein with adenine nucleotide alpha hydrolases-like domain
AT1G18150.2 - Protein kinase superfamily protein
AT1G19090.1 - receptor-like serine/threonine kinase 2
AT1G20440.1 - cold-regulated 47
AT1G20450.1 - Dehydrin family protein
AT1G20620.1 - catalase 3
AT1G20630.1 - catalase 1
AT1G21590.1 - Protein kinase protein with adenine nucleotide alpha hydrolases-like domain
AT1G24110.1 - Peroxidase superfamily protein
AT1G27330.1 - Ribosome associated membrane protein RAMP4
AT1G27350.1 - Ribosome associated membrane protein RAMP4
AT1G30360.1 - Early-responsive to dehydration stress protein (ERD4)
AT1G30870.1 - Peroxidase superfamily protein
AT1G31120.1 - K+ uptake permease 10
AT1G32090.1 - early-responsive to dehydration stress protein (ERD4)
AT1G32330.1 - heat shock transcription factor A1D
AT1G34510.1 - Peroxidase superfamily protein
AT1G35515.1 - high response to osmotic stress 10
AT1G44760.1 - Adenine nucleotide alpha hydrolases-like superfamily protein
AT1G44970.1 - Peroxidase superfamily protein
AT1G46264.1 - heat shock transcription factor B4
AT1G48960.1 - Adenine nucleotide alpha hydrolases-like superfamily protein
AT1G49570.1 - Peroxidase superfamily protein
AT1G51360.1 - dimeric A/B barrel domainS-protein 1
AT1G52827.1 - cadmium tolerance 1
AT1G53510.1 - mitogen-activated protein kinase 18
AT1G53670.1 - methionine sulfoxide reductase B 1
AT1G55805.1 - BolA-like family protein
AT1G56060.1 - (M=5) PTHR31568:SF17 - EXPRESSED PROTEIN
AT1G56280.1 - drought-induced 19
AT1G57550.1 - Low temperature and salt responsive protein family
AT1G59580.1 - mitogen-activated protein kinase homolog 2
AT1G59580.1 - mitogen-activated protein kinase homolog 2
AT1G60160.1 - Potassium transporter family protein
AT1G61750.1 - Receptor-like protein kinase-related family protein
AT1G62320.1 - ERD (early-responsive to dehydration stress) family protein
AT1G62740.1 - stress-inducible protein, putative
AT1G63460.1 - glutathione peroxidase 8
AT1G63550.1 - Receptor-like protein kinase-related family protein
AT1G63560.1 - Receptor-like protein kinase-related family protein
AT1G63570.1 - Receptor-like protein kinase-related family protein
AT1G63580.1 - Receptor-like protein kinase-related family protein
AT1G63590.1 - Receptor-like protein kinase-related family protein
AT1G63600.1 - Receptor-like protein kinase-related family protein
AT1G67970.1 - heat shock transcription factor A8
AT1G68300.1 - Adenine nucleotide alpha hydrolases-like superfamily protein
AT1G68850.1 - Peroxidase superfamily protein
AT1G69080.1 - Adenine nucleotide alpha hydrolases-like superfamily protein
AT1G69450.1 - Early-responsive to dehydration stress protein (ERD4)
AT1G70300.1 - K+ uptake permease 6
AT1G70520.1 - cysteine-rich RLK (RECEPTOR-like protein kinase) 2
AT1G70530.1 - cysteine-rich RLK (RECEPTOR-like protein kinase) 3
AT1G70690.1 - Receptor-like protein kinase-related family protein
AT1G71695.1 - Peroxidase superfamily protein
AT1G73670.1 - MAP kinase 15
AT1G73805.1 - Calmodulin binding protein-like
AT1G76080.1 - chloroplastic drought-induced stress protein of 32 kD
AT1G76180.1 - Dehydrin family protein
AT1G77100.1 - Peroxidase superfamily protein
AT1G77280.1 - Protein kinase protein with adenine nucleotide alpha hydrolases-like domain
AT1G77490.1 - thylakoidal ascorbate peroxidase
AT1G78940.2 - Protein kinase protein with adenine nucleotide alpha hydrolases-like domain
AT2G01450.1 - MAP kinase 17
AT2G01660.1 - plasmodesmata-located protein 6
AT2G03720.1 - Adenine nucleotide alpha hydrolases-like superfamily protein
AT2G03720.1 - Adenine nucleotide alpha hydrolases-like superfamily protein
AT2G04030.1 - Chaperone protein htpG family protein
AT2G07020.1 - Protein kinase protein with adenine nucleotide alpha hydrolases-like domain
AT2G18030.1 - Peptide methionine sulfoxide reductase family protein
AT2G18140.1 - Peroxidase superfamily protein
AT2G18150.1 - Peroxidase superfamily protein
AT2G18170.1 - MAP kinase 7
AT2G18170.1 - MAP kinase 7
AT2G18750.1 - Calmodulin-binding protein
AT2G18750.1 - Calmodulin-binding protein
AT2G18980.1 - Peroxidase superfamily protein
AT2G21490.1 - dehydrin LEA
AT2G21620.2 - Adenine nucleotide alpha hydrolases-like superfamily protein
AT2G21970.1 - stress enhanced protein 2
AT2G22420.1 - Peroxidase superfamily protein
AT2G24040.1 - Low temperature and salt responsive protein family
AT2G24300.2 - Calmodulin-binding protein
AT2G24370.1 - Protein kinase protein with adenine nucleotide alpha hydrolases-like domain
AT2G24800.1 - Peroxidase superfamily protein
AT2G25080.1 - glutathione peroxidase 1
AT2G26150.1 - heat shock transcription factor A2
AT2G28190.1 - copper/zinc superoxide dismutase 2
AT2G30070.1 - potassium transporter 1
AT2G31570.1 - glutathione peroxidase 2
AT2G31620.1 - Receptor-like protein kinase-related family protein
AT2G31670.1 - Stress responsive alpha-beta barrel domain protein
AT2G32190.1 - (M=5) PTHR31568:SF17 - EXPRESSED PROTEIN
AT2G32200.1 - (M=5) PTHR31568:SF17 - EXPRESSED PROTEIN
AT2G32210.1 - (M=5) PTHR31568:SF17 - EXPRESSED PROTEIN
AT2G32500.1 - Stress responsive alpha-beta barrel domain protein
AT2G33330.1 - plasmodesmata-located protein 3
AT2G34060.1 - Peroxidase superfamily protein
AT2G35060.2 - K+ uptake permease 11
AT2G35380.1 - Peroxidase superfamily protein
AT2G35520.2 - Defender against death (DAD family)
AT2G37130.1 - Peroxidase superfamily protein
AT2G38380.1 - Peroxidase superfamily protein
AT2G38380.1 - Peroxidase superfamily protein
AT2G38390.1 - Peroxidase superfamily protein
AT2G38905.1 - Low temperature and salt responsive protein family
AT2G38905.1 - Low temperature and salt responsive protein family
AT2G39040.1 - Peroxidase superfamily protein
AT2G40170.1 - Stress induced protein
AT2G40540.1 - potassium transporter 2
AT2G41480.1 - Peroxidase superfamily protein
AT2G41690.1 - heat shock transcription factor B3
AT2G41835.1 - zinc finger (C2H2 type, AN1-like) family protein
AT2G42880.1 - MAP kinase 20
AT2G43350.1 - glutathione peroxidase 3
AT2G43480.1 - Peroxidase superfamily protein
AT2G43790.1 - MAP kinase 6
AT2G46070.1 - mitogen-activated protein kinase 12
AT2G47710.1 - Adenine nucleotide alpha hydrolases-like superfamily protein
AT2G48150.1 - glutathione peroxidase 4
AT3G01190.1 - Peroxidase superfamily protein
AT3G01520.1 - Adenine nucleotide alpha hydrolases-like superfamily protein
AT3G02050.1 - K+ uptake transporter 3
AT3G02480.1 - Late embryogenesis abundant protein (LEA) family protein
AT3G02990.1 - heat shock transcription factor A1E
AT3G03270.1 - Adenine nucleotide alpha hydrolases-like superfamily protein
AT3G03290.1 - Adenine nucleotide alpha hydrolases-like superfamily protein
AT3G04370.1 - plasmodesmata-located protein 4
AT3G05700.1 - Drought-responsive family protein
AT3G05880.1 - Low temperature and salt responsive protein family
AT3G05890.1 - Low temperature and salt responsive protein family
AT3G06760.2 - Drought-responsive family protein
AT3G07770.1 - HEAT SHOCK PROTEIN 89.1
AT3G09640.1 - ascorbate peroxidase 2
AT3G11930.3 - Adenine nucleotide alpha hydrolases-like superfamily protein
AT3G12050.1 - Aha1 domain-containing protein
AT3G12630.1 - A20/AN1-like zinc finger family protein
AT3G14720.1 - MAP kinase 19
AT3G17020.1 - Adenine nucleotide alpha hydrolases-like superfamily protein
AT3G17070.1 - Peroxidase family protein
AT3G17210.1 - heat stable protein 1
AT3G18040.1 - MAP kinase 9
AT3G19550.1 - (M=5) PF03242 - Late embryogenesis abundant protein (LEA_3)
AT3G20200.1 - Protein kinase protein with adenine nucleotide alpha hydrolases-like domain
AT3G21210.1 - zinc ion binding
AT3G21620.1 - ERD (early-responsive to dehydration stress) family protein
AT3G21900.1 - Receptor-like protein kinase-related family protein
AT3G21910.1 - Domain of unknown function (DUF26)
AT3G21920.1 - Domain of unknown function (DUF26)
AT3G21930.1 - Domain of unknown function (DUF26)
AT3G21940.1 - Receptor protein kinase-related
AT3G21945.1 - Receptor-like protein kinase-related family protein
AT3G21960.2 - Receptor-like protein kinase-related family protein
AT3G21970.1 - Domain of unknown function (DUF26)
AT3G21980.1 - Domain of unknown function (DUF26)
AT3G21990.1 - Domain of unknown function (DUF26)
AT3G22000.1 - Domain of unknown function (DUF26)
AT3G22010.1 - Receptor-like protein kinase-related family protein
AT3G22020.1 - Receptor-like protein kinase-related family protein
AT3G22030.1 - Receptor protein kinase-related
AT3G22040.1 - Domain of unknown function (DUF26)
AT3G22050.1 - Domain of unknown function (DUF26)
AT3G22060.1 - Receptor-like protein kinase-related family protein
AT3G22231.1 - pathogen and circadian controlled 1
AT3G22235.1 - (M=3) PTHR31568:SF16 - GENOMIC DNA, CHROMOSOME 3, P1 CLONE: MMP21
AT3G22240.1 - (M=3) PTHR31568:SF16 - GENOMIC DNA, CHROMOSOME 3, P1 CLONE: MMP21
AT3G22830.1 - heat shock transcription factor A6B
AT3G24520.1 - heat shock transcription factor C1
AT3G25930.1 - Adenine nucleotide alpha hydrolases-like superfamily protein
AT3G29040.1 - Domain of unknown function (DUF26)
AT3G29050.1 - receptor-like protein kinase-related
AT3G42570.1 - peroxidase family protein
AT3G45640.1 - mitogen-activated protein kinase 3
AT3G45860.1 - cysteine-rich RLK (RECEPTOR-like protein kinase) 4
AT3G49110.1 - peroxidase CA
AT3G49120.1 - peroxidase CB
AT3G50970.1 - dehydrin family protein
AT3G50980.1 - dehydrin xero 1
AT3G51810.1 - Stress induced protein
AT3G51910.1 - heat shock transcription factor A7A
AT3G53770.1 - late embryogenesis abundant 3 (LEA3) family protein
AT3G53990.1 - Adenine nucleotide alpha hydrolases-like superfamily protein
AT3G54510.2 - Early-responsive to dehydration stress protein (ERD4)
AT3G57480.1 - zinc finger (C2H2 type, AN1-like) family protein
AT3G58310.1 - Domain of unknown function (DUF26)
AT3G58450.1 - Adenine nucleotide alpha hydrolases-like superfamily protein
AT3G59790.1 - MAP kinase 10
AT3G60720.1 - plasmodesmata-located protein 8
AT3G60950.1 - C2 calcium/lipid-binding endonuclease/exonuclease/phosphatase
AT3G61030.1 - Calcium-dependent lipid-binding (CaLB domain) family protein
AT3G61050.1 - Calcium-dependent lipid-binding (CaLB domain) family protein
AT3G62550.1 - Adenine nucleotide alpha hydrolases-like superfamily protein
AT3G63080.1 - glutathione peroxidase 5
AT3G63350.1 - winged-helix DNA-binding transcription factor family protein
AT4G00970.1 - cysteine-rich RLK (RECEPTOR-like protein kinase) 41
AT4G01370.1 - MAP kinase 4
AT4G01595.1 - Protein kinase superfamily protein
AT4G02200.3 - Drought-responsive family protein
AT4G02380.1 - senescence-associated gene 21
AT4G02900.1 - ERD (early-responsive to dehydration stress) family protein
AT4G04340.2 - ERD (early-responsive to dehydration stress) family protein
AT4G04490.1 - cysteine-rich RLK (RECEPTOR-like protein kinase) 36
AT4G04500.1 - cysteine-rich RLK (RECEPTOR-like protein kinase) 37
AT4G04510.1 - cysteine-rich RLK (RECEPTOR-like protein kinase) 38
AT4G04540.1 - cysteine-rich RLK (RECEPTOR-like protein kinase) 39
AT4G04570.1 - cysteine-rich RLK (RECEPTOR-like protein kinase) 40
AT4G04800.1 - methionine sulfoxide reductase B3
AT4G04810.1 - methionine sulfoxide reductase B4
AT4G04830.1 - methionine sulfoxide reductase B5
AT4G04840.1 - methionine sulfoxide reductase B6
AT4G05200.1 - cysteine-rich RLK (RECEPTOR-like protein kinase) 25
AT4G08390.1 - stromal ascorbate peroxidase
AT4G09010.1 - ascorbate peroxidase 4
AT4G11330.1 - MAP kinase 5
AT4G11460.1 - cysteine-rich RLK (RECEPTOR-like protein kinase) 30
AT4G11470.1 - cysteine-rich RLK (RECEPTOR-like protein kinase) 31
AT4G11480.1 - cysteine-rich RLK (RECEPTOR-like protein kinase) 32
AT4G11490.1 - cysteine-rich RLK (RECEPTOR-like protein kinase) 33
AT4G11521.1 - Receptor-like protein kinase-related family protein
AT4G11530.1 - cysteine-rich RLK (RECEPTOR-like protein kinase) 34
AT4G11600.1 - glutathione peroxidase 6
AT4G11660.1 - winged-helix DNA-binding transcription factor family protein
AT4G12040.1 - A20/AN1-like zinc finger family protein
AT4G12400.2 - stress-inducible protein, putative
AT4G13420.1 - high affinity K+ transporter 5
AT4G13450.1 - Adenine nucleotide alpha hydrolases-like superfamily protein
AT4G13980.1 - winged-helix DNA-binding transcription factor family protein
AT4G13980.1 - winged-helix DNA-binding transcription factor family protein
AT4G14225.1 - A20/AN1-like zinc finger family protein
AT4G15430.1 - ERD (early-responsive to dehydration stress) family protein
AT4G15910.1 - drought-induced 21
AT4G17750.1 - heat shock factor 1
AT4G17750.1 - heat shock factor 1
AT4G19630.1 - winged-helix DNA-binding transcription factor family protein
AT4G19960.1 - K+ uptake permease 9
AT4G20530.1 - Protein with domains of unknown function (DUF26 and DUF1204)
AT4G20540.1 - Protein with domains of unknown function (DUF26 and DUF1204)
AT4G20550.1 - Protein with domains of unknown function (DUF26 and DUF1204)
AT4G20560.1 - Protein with domains of unknown function (DUF26 and DUF1204)
AT4G20570.1 - Protein with domains of unknown function (DUF26 and DUF1204)
AT4G20580.1 - Protein with domains of unknown function (DUF26 and DUF1204)
AT4G20590.1 - Protein with domains of unknown function (DUF26 and DUF1204)
AT4G20600.1 - Protein with domains of unknown function (DUF26 and DUF1204)
AT4G20610.1 - Protein with domains of unknown function (DUF26 and DUF1204)
AT4G20620.1 - Protein with domains of unknown function (DUF26 and DUF1204)
AT4G20630.1 - Protein with domains of unknown function (DUF26 and DUF1204)
AT4G20640.1 - Protein with domains of unknown function (DUF26 and DUF1204)
AT4G20650.1 - receptor-like protein kinase-related
AT4G20670.1 - Domain of unknown function (DUF26)
AT4G20680.1 - Domain of unknown function (DUF26)
AT4G21230.1 - cysteine-rich RLK (RECEPTOR-like protein kinase) 27
AT4G21400.1 - cysteine-rich RLK (RECEPTOR-like protein kinase) 28
AT4G21410.1 - cysteine-rich RLK (RECEPTOR-like protein kinase) 29
AT4G21830.1 - methionine sulfoxide reductase B7
AT4G21840.1 - methionine sulfoxide reductase B8
AT4G21850.1 - methionine sulfoxide reductase B9
AT4G21860.1 - methionine sulfoxide reductase B 2
AT4G21960.1 - Peroxidase superfamily protein
AT4G22120.1 - ERD (early-responsive to dehydration stress) family protein
AT4G22820.1 - A20/AN1-like zinc finger family protein
AT4G23130.2 - cysteine-rich RLK (RECEPTOR-like protein kinase) 5
AT4G23140.2 - cysteine-rich RLK (RECEPTOR-like protein kinase) 6
AT4G23150.1 - cysteine-rich RLK (RECEPTOR-like protein kinase) 7
AT4G23160.1 - cysteine-rich RLK (RECEPTOR-like protein kinase) 8
AT4G23160.1 - cysteine-rich RLK (RECEPTOR-like protein kinase) 8
AT4G23170.1 - receptor-like protein kinase-related family protein
AT4G23180.1 - cysteine-rich RLK (RECEPTOR-like protein kinase) 10
AT4G23190.1 - cysteine-rich RLK (RECEPTOR-like protein kinase) 11
AT4G23200.1 - cysteine-rich RLK (RECEPTOR-like protein kinase) 12
AT4G23210.3 - cysteine-rich RLK (RECEPTOR-like protein kinase) 13
AT4G23220.1 - cysteine-rich RLK (RECEPTOR-like protein kinase) 14
AT4G23230.1 - cysteine-rich RLK (RECEPTOR-like protein kinase) 15
AT4G23250.1 - kinases;protein kinases
AT4G23260.1 - cysteine-rich RLK (RECEPTOR-like protein kinase) 18
AT4G23270.1 - cysteine-rich RLK (RECEPTOR-like protein kinase) 19
AT4G23280.1 - cysteine-rich RLK (RECEPTOR-like protein kinase) 20
AT4G23290.2 - cysteine-rich RLK (RECEPTOR-like protein kinase) 21
AT4G23300.1 - cysteine-rich RLK (RECEPTOR-like protein kinase) 22
AT4G23310.1 - cysteine-rich RLK (RECEPTOR-like protein kinase) 23
AT4G23640.1 - Potassium transporter family protein
AT4G24190.1 - Chaperone protein htpG family protein
AT4G25130.1 - peptide met sulfoxide reductase 4
AT4G25160.1 - U-box domain-containing protein kinase family protein
AT4G25380.1 - stress-associated protein 10
AT4G25800.1 - Calmodulin-binding protein
AT4G26500.1 - chloroplast sulfur E
AT4G27320.1 - Adenine nucleotide alpha hydrolases-like superfamily protein
AT4G28088.1 - Low temperature and salt responsive protein family
AT4G28670.1 - Protein kinase family protein with domain of unknown function (DUF26)
AT4G30170.1 - Peroxidase family protein
AT4G30650.1 - Low temperature and salt responsive protein family
AT4G30660.1 - Low temperature and salt responsive protein family
AT4G31000.1 - Calmodulin-binding protein
AT4G31230.1 - Protein kinase protein with adenine nucleotide alpha hydrolases-like domain
AT4G31870.1 - glutathione peroxidase 7
AT4G32320.1 - ascorbate peroxidase 6
AT4G33530.1 - K+ uptake permease 5
AT4G33660.1 - (M=12) PF12734 - Cysteine-rich TM module stress tolerance (CYSTM)
AT4G34190.1 - stress enhanced protein 1
AT4G35000.1 - ascorbate peroxidase 3
AT4G35000.1 - ascorbate peroxidase 3
AT4G35090.1 - catalase 2
AT4G35870.1 - early-responsive to dehydration stress protein (ERD4)
AT4G35970.1 - ascorbate peroxidase 5
AT4G35970.1 - ascorbate peroxidase 5
AT4G36450.1 - mitogen-activated protein kinase 14
AT4G36990.1 - heat shock factor 4
AT4G38410.1 - Dehydrin family protein
AT4G38830.1 - cysteine-rich RLK (RECEPTOR-like protein kinase) 26
AT4G39130.1 - Dehydrin family protein
AT5G03720.1 - heat shock transcription factor A3
AT5G04080.1 - (M=12) PF12734 - Cysteine-rich TM module stress tolerance (CYSTM)
AT5G06720.1 - peroxidase 2
AT5G07460.1 - peptidemethionine sulfoxide reductase 2
AT5G07470.1 - peptidemethionine sulfoxide reductase 3
AT5G09400.1 - K+ uptake permease 7
AT5G09830.1 - BolA-like family protein
AT5G12000.1 - Protein kinase protein with adenine nucleotide alpha hydrolases-like domain
AT5G14680.1 - Adenine nucleotide alpha hydrolases-like superfamily protein
AT5G14880.1 - Potassium transporter family protein
AT5G15960.1 - stress-responsive protein (KIN1) / stress-induced protein (KIN1)
AT5G15970.1 - stress-responsive protein (KIN2) / stress-induced protein (KIN2) / cold-responsive protein (COR6.6) / cold-regulated protein (COR6.6)
AT5G16820.1 - heat shock factor 3
AT5G17390.1 - Adenine nucleotide alpha hydrolases-like superfamily protein
AT5G17560.1 - BolA-like family protein
AT5G19010.1 - mitogen-activated protein kinase 16
AT5G20310.1 - Adenine nucleotide alpha hydrolases-like superfamily protein
AT5G22410.1 - root hair specific 18
AT5G22580.1 - Stress responsive A/B Barrel Domain
AT5G26920.1 - Cam-binding protein 60-like G
AT5G26990.1 - Drought-responsive family protein
AT5G35380.1 - Protein kinase protein with adenine nucleotide alpha hydrolases-like domain
AT5G37660.2 - plasmodesmata-located protein 7
AT5G38760.1 - Late embryogenesis abundant protein (LEA) family protein
AT5G39580.1 - Peroxidase superfamily protein
AT5G40380.1 - cysteine-rich RLK (RECEPTOR-like protein kinase) 42
AT5G41280.1 - Receptor-like protein kinase-related family protein
AT5G43840.1 - heat shock transcription factor A6A
AT5G43980.1 - plasmodesmata-located protein 1
AT5G47740.2 - Adenine nucleotide alpha hydrolases-like superfamily protein
AT5G48205.1 - zinc ion binding
AT5G48540.1 - receptor-like protein kinase-related family protein
AT5G49050.1 - (M=2) PTHR31964:SF16 - ADENINE NUCLEOTIDE ALPHA HYDROLASES-LIKE PROTEIN
AT5G49230.1 - Drought-responsive family protein
AT5G52640.1 - heat shock protein 90.1
AT5G53820.1 - Late embryogenesis abundant protein (LEA) family protein
AT5G54070.1 - heat shock transcription factor A9
AT5G54430.1 - Adenine nucleotide alpha hydrolases-like superfamily protein
AT5G55470.1 - Na+/H+ (sodium hydrogen) exchanger 3
AT5G56000.1 - HEAT SHOCK PROTEIN 81.4
AT5G56010.1 - heat shock protein 81-3
AT5G56030.2 - heat shock protein 81-2
AT5G56550.1 - oxidative stress 3
AT5G57580.1 - Calmodulin-binding protein
AT5G60340.1 - P-loop containing nucleoside triphosphate hydrolases superfamily protein
AT5G61640.1 - peptidemethionine sulfoxide reductase 1
AT5G61820.1 - (M=1) PF07712 - Stress up-regulated Nod 19 (SURNod19)
AT5G62020.1 - heat shock transcription factor B2A
AT5G62570.2 - Calmodulin binding protein-like
AT5G63940.1 - Protein kinase protein with adenine nucleotide alpha hydrolases-like domain
AT5G64100.1 - Peroxidase superfamily protein
AT5G66400.1 - Dehydrin family protein
AT5G67400.1 - root hair specific 19
AT5G67600.1 - unknown protein

## Sheet: StressGenAth
AT1G01170.1	Protein of unknown function
AT1G01470.1	LATE EMBRYOGENESIS ABUNDANT 14 (LEA14)
AT1G01580.1	FRO2
AT1G01680.1	PLANT U-BOX 54 (PUB54)
AT1G02820.1	Late embryogenesis abundant 3 (LEA3) family protein
AT1G02920.1	AtGST11
AT1G02930.1	AtGST1
AT1G03190.1	ULTRAVIOLET HYPERSENSITIVE 6 (UVH6)
AT1G03220.1	Peptidase aspartic:IPR021109(1)
AT1G03230.1	Eukaryotic aspartyl protease family protein
AT1G03980.1	AtPCS2
AT1G04980.1	PDI-LIKE 2-2 (PDIL2-2)
AT1G05240.1	Peroxidase superfamily protein
AT1G05250.1	Peroxidase superfamily protein
AT1G05260.1	RARE COLD INDUCIBLE GENE 3 (RCI3)
AT1G05300.1	ZIP5
AT1G05520.1	Sec23/Sec24 protein transport family protein
AT1G05850.1	POM-POM1 (POM1)
AT1G06390.1	GSK3/SHAGGY-LIKE PROTEIN KINASE 1 (GSK1)
AT1G06770.1	DREB2A-INTERACTING PROTEIN 1 (DRIP1)
AT1G07350.1	SERINE/ARGININE RICH-LIKE PROTEIN 45A (SR45a)
AT1G07530.1	SCARECROW-LIKE 14 (SCL14)
AT1G07600.1	METALLOTHIONEIN 1
AT1G07870.2	Protein kinase superfamily protein
AT1G07890.3	ASCORBATE PEROXIDASE 1 (APX1)
AT1G08430.1	ALMT1
AT1G08800.1	Protein of unknown function, DUF593
AT1G08830.1	COPPER/ZINC SUPEROXIDE DISMUTASE 1 (CSD1)
AT1G09740.1	Adenine nucleotide alpha hydrolases-like superfamily protein
AT1G09940.1	(HEMA2)
AT1G09970.2	(LRR XI-23)
AT1G10090.1	unknown protein
AT1G10370.1	EARLY-RESPONSIVE TO DEHYDRATION 9 (ERD9)
AT1G10570.1	OVERLY TOLERANT TO SALT 2 (OTS2)
AT1G10670.3	ATP-CITRATE LYASE A-1 (ACLA-1)
AT1G10880.1	Glycosyl transferase, family
AT1G10940.2	SNF1-RELATED PROTEIN KINASE 2.4 (SNRK2.4)
AT1G10970.1	ZIP4
AT1G11210.1	Protein of unknown function DUF761,
AT1G11360.1	Adenine nucleotide alpha hydrolases-like superfamily protein
AT1G11755.1	LEAF WILTING 1 (LEW1)
AT1G11960.1	ERD (early-responsive to dehydration stress) family protein
AT1G12060.1	BCL-2-ASSOCIATED ATHANOGENE 5 (BAG5)
AT1G12610.1	DWARF AND DELAYED FLOWERING 1 (DDF1)
AT1G12780.1	UDP-D-GLUCOSE/UDP-D-GALACTOSE 4-EPIMERASE 1 (UGE1)
AT1G12860.1	SCREAM 2 (SCRM2)
AT1G13440.1	GLYCERALDEHYDE-3-PHOSPHATE DEHYDROGENASE C2 (GAPC2)
AT1G13740.1	ABI FIVE BINDING PROTEIN 2 (AFP2)
AT1G13930.1	Involved in response to salt stress.
AT1G14210.1	Ribonuclease T2, active site:IPR018188(2)
AT1G14540.1	Peroxidase, active site:IPR019794(1).
AT1G14550.1	Plant peroxidase:IPR000823(9)
AT1G14920.1	GIBBERELLIC ACID INSENSITIVE (GAI)
AT1G15930.2	Ribosomal protein L7Ae/L30e/S12e/Gadd45 family protein
AT1G16540.1	ABA DEFICIENT 3 (ABA3)
AT1G16760.1	Tyrosine-protein kinase, catalytic domain:IPR020635(1)
AT1G16850.1	unknown protein
AT1G17540.1	Serine/threonine-protein kinase-like domain:IPR017442(1).
AT1G17880.1	BASIC TRANSCRIPTION FACTOR 3 (BTF3)
AT1G20440.1	COLD-REGULATED 47 (COR47)
AT1G21250.1	WAK1
AT1G21590.1	Serine/threonine-protein kinase, active site:IPR008271(1).
AT1G21750.1	PDI-LIKE 1-1 (PDIL1-1)
AT1G21760.1	F-BOX PROTEIN 7 (FBP7)
AT1G21980.1	PHOSPHATIDYLINOSITOL-4-PHOSPHATE 5-KINASE 1 (PIP5K1)
AT1G22190.1	AP2 domain-containing transcription factor, putative
AT1G22770.1	GIGANTEA (GI)
AT1G23230.1	Component of the Mediator complex, a coactivator involved in the regulated transcription of nearly all RNA polymerase
AT1G24110.1	Peroxidases heam-ligand binding site:IPR019793(1)
AT1G26320.1	NADP-dependent oxidoreductase, putative
AT1G27730.1	SALT TOLERANCE ZINC FINGER (STZ)
AT1G27760.3	SALT-TOLERANCE 32 (SAT32)
AT1G28380.1	NECROTIC SPOTTED LESIONS 1 (NSL1)
AT1G30360.1	EARLY-RESPONSIVE TO DEHYDRATION 4 (ERD4)
AT1G30870.1	Peroxidase superfamily protein
AT1G31170.4	SULFIREDOXIN (SRX)
AT1G31260.1	ZIP10
AT1G31470.1	NUCLEAR FUSION DEFECTIVE 4 (NFD4)
AT1G31970.1	STRESS RESPONSE SUPPRESSOR 1 (STRS1)
AT1G32090.1	early-responsive to dehydration
AT1G32210.1	DOLICHYL-DIPHOSPHOOLIGOSACCHARIDE--PROTEIN GLYCOSYLTRANSFERASE SUBUNIT DAD1
AT1G32220.1	NAD-dependent epimerase/dehydratase:IPR001509(1)
AT1G32230.1	RADICAL-INDUCED CELL DEATH1 (RCD1)
AT1G32330.1	HEAT SHOCK TRANSCRIPTION FACTOR A1D (HSFA1D)
AT1G32640.1	(MYC2)
AT1G34000.1	ONE-HELIX PROTEIN 2 (OHP2)
AT1G34370.2	SENSITIVE TO PROTON RHIZOTOXICITY 1 (STOP1)
AT1G34510.1	Peroxidase, active site:IPR019794(1)
AT1G35515.1	HIGH RESPONSE TO OSMOTIC STRESS 10 (HOS10)
AT1G35620.1	PDI-LIKE 5-2 (PDIL5-2)
AT1G35670.1	CALCIUM-DEPENDENT PROTEIN KINASE 2 (CDPK2)
AT1G35720.1	ANNEXIN 1 (ANNAT1)
AT1G42990.1	BASIC REGION/LEUCINE ZIPPER MOTIF 60 (BZIP60)
AT1G44760.1	Adenine nucleotide alpha hydrolases-like superfamily protein
AT1G44970.1	Peroxidase superfamily protein
AT1G45249.3	ABSCISIC ACID RESPONSIVE ELEMENTS-BINDING FACTOR 2 (ABF2)
AT1G47128.1	RESPONSIVE TO DEHYDRATION 21 (RD21)
AT1G47960.1	CELL WALL / VACUOLAR INHIBITOR OF FRUCTOSIDASE 1 (C/VIF1)
AT1G48605.1	(ATHAL3B)
AT1G48960.1	Adenine nucleotide alpha hydrolases-like superfamily protein
AT1G49570.1	Peroxidase, active site:IPR019794(1)
AT1G49670.2	alcohol dehydrogenase zinc-binding
AT1G50460.1	HEXOKINASE-LIKE 1 (HKL1)
AT1G50500.2	HEAT-INTOLERANT 1 (HIT1)
AT1G50960.1	GIBBERELLIN 2-OXIDASE 7 (GA2OX7)
AT1G51490.1	BETA GLUCOSIDASE 36 (BGLU36)
AT1G51980.1	Peptidase M16, zinc-binding site:IPR001431(1)
AT1G52000.1	Mannose-binding lectin superfamily protein
AT1G52200.1	unknown protein
AT1G52260.1	PDI-LIKE 1-5 (PDIL1-5)
AT1G52760.1	LYSOPHOSPHOLIPASE 2 (LysoPL2)
AT1G53165.3	(ATMAP4K ALPHA1)
AT1G53670.1	METHIONINE SULFOXIDE REDUCTASE B 1 (MSRB1)
AT1G54410.1	dehydrin family protein
AT1G55450.2	Methyltransferase type 11:IPR013216(1)
AT1G55490.1	CHAPERONIN 60 BETA (CPN60B)
AT1G55870.1	ABA-HYPERSENSITIVE GERMINATION 2 (AHG2)
AT1G55910.1	ZIP11
AT1G56010.2	NAC DOMAIN CONTAINING PROTEIN 1 (NAC1)
AT1G56280.1	DROUGHT-INDUCED 19 (DI19)
AT1G56570.1	PENTATRICOPEPTIDE REPEAT PROTEIN FOR GERMINATION ON NACL (PGN)
AT1G56600.1	GALACTINOL SYNTHASE 2 (GolS2)
AT1G57870.3	SHAGGY-LIKE KINASE 42 (SK42)
AT1G58340.1	ZF14
AT1G58520.2	RXW8
AT1G59960.1	NAD(P)-linked oxidoreductase superfamily protein
AT1G60220.1	UB-LIKE PROTEASE 1D (ULP1D)
AT1G60490.1	VACUOLAR PROTEIN SORTING 34 (VPS34)
AT1G60940.1	SNF1-RELATED PROTEIN KINASE 2.10 (SNRK2.10)
AT1G61340.2	F-box protein
AT1G62300.1	WRKY6
AT1G62320.1	ERD (early-responsive to dehydration stress) family
AT1G62480.1	Vacuolar calcium-binding protein-related
AT1G63440.1	HMA5
AT1G63460.1	GLUTATHIONE PEROXIDASE 8 (GPX8)
AT1G64190.1	6-phosphogluconate dehydrogenase family protein;
AT1G64550.1	ATP-BINDING CASSETTE F3 (ABCF3)
AT1G65930.1	CYTOSOLIC NADP+-DEPENDENT ISOCITRATE DEHYDROGENASE (cICDH)
AT1G66270.1	BGLU21
AT1G66280.1	BGLU22
AT1G66350.1	RGA-LIKE 1 (RGL1)
AT1G66600.1	ABA OVERLY SENSITIVE MUTANT 3 (ABO3)
AT1G67760.1	TCP-1/cpn60 chaperonin family protein (555 aa)
AT1G67970.1	HEAT SHOCK TRANSCRIPTION FACTOR A8 (HSFA8)
AT1G68300.1	Adenine nucleotide alpha hydrolases-like superfamily protein
AT1G68850.1	Peroxidase superfamily
AT1G69080.1	Adenine nucleotide alpha hydrolases-like superfamily protein
AT1G69190.1	Dihydropteroate synthase-like:IPR011005(1)
AT1G69450.1	Domain of unknown function
AT1G69600.1	ZINC FINGER HOMEODOMAIN 1 (ZFHD1)
AT1G69700.1	HVA22 HOMOLOGUE C (HVA22C)
AT1G71695.1	Peroxidases heam-ligand binding site:IPR019793(1)
AT1G71860.1	PROTEIN TYROSINE PHOSPHATASE 1 (PTP1)
AT1G72060.1	serine-type endopeptidase inhibitor activity
AT1G72760.1	Serine/threonine-protein kinase-like domain:IPR017442(1)
AT1G73120.1	response to oxidative stress
AT1G73230.1	Nascent polypeptide-associated complex NAC
AT1G73330.1	DROUGHT-REPRESSED 4 (DR4)
AT1G74310.1	HEAT SHOCK PROTEIN 101 (HSP101)
AT1G74520.1	HVA22 HOMOLOGUE A (HVA22A)
AT1G74920.1	ALDEHYDE DEHYDROGENASE 10A8 (ALDH10A8)
AT1G75040.1	PATHOGENESIS-RELATED GENE 5 (PR5)
AT1G75280.1	NAD(P)-binding Rossmann-fold superfamily protein
AT1G76080.1	CHLOROPLASTIC DROUGHT-INDUCED STRESS PROTEIN OF 32 KD (CDSP32)
AT1G76180.1	EARLY RESPONSE TO DEHYDRATION 14 (ERD14)
AT1G77100.1	Peroxidase superfamily protein
AT1G77180.1	SKI-interacting protein SKIP, SNW domain
AT1G77235.1	MICRORNA402 (MIR402)
AT1G77280.1	Tyrosine-protein kinase, catalytic domain
AT1G77510.1	PDI-LIKE 1-2 (PDIL1-2)
AT1G78290.2	SNF1-RELATED PROTEIN KINASE 2-8 (SNRK2-8)
AT1G78380.1	GLUTATHIONE S-TRANSFERASE TAU 19 (GSTU19)
AT1G78940.2	protein tyrosine kinase activity
AT1G79340.1	METACASPASE 4 (MC4)
AT1G79680.1	WALL ASSOCIATED KINASE (WAK)-LIKE 10 (WAKL10)
AT1G80130.1	Tetratricopeptide repeat (TPR)-like superfamily protein
AT1G80310.1	MOLYBDATE TRANSPORTER 2 (MOT2)
AT1G80710.1	DROUGHT SENSITIVE 1 (DRS1)
AT1G80830.1	AtNRAMP1
AT2G01140.1	PIGMENT DEFECTIVE 345 (PDE345)
AT2G01180.1	PHOSPHATIDIC ACID PHOSPHATASE 1 (PAP1)
AT2G01570.1	REPRESSOR OF GA1-3 1 (RGA1)
AT2G01980.1	SALT OVERLY SENSITIVE 1 (SOS1)
AT2G03445.1	MICRORNA398A (MIR398A)
AT2G04240.1	small protein with an N-terminal trans-membrane domain
AT2G04880.1	ZINC-DEPENDENT ACTIVATOR PROTEIN-1 (ZAP1)
AT2G05710.1	ACONITASE 3 (ACO3)
AT2G16060.1	HEMOGLOBIN 1 (HB1)
AT2G17520.1	IRE1A
AT2G17840.1	EARLY-RESPONSIVE TO DEHYDRATION 7 (ERD7)
AT2G18140.1	Peroxidase superfamily protein
AT2G18150.1	Peroxidase superfamily protein
AT2G18190.1	P-loop containing nucleoside triphosphate hydrolases
AT2G18950.1	HOMOGENTISATE PHYTYLTRANSFERASE 1 (HPT1)
AT2G18980.1	Peroxidases heam-ligand binding site:IPR019793(1)
AT2G19110.1	HMA4
AT2G19810.1	OXIDATION-RELATED ZINC FINGER 1 (OZF1)
AT2G20360.1	NAD-dependent epimerase/dehydratase
AT2G21195.2	unknown protein
AT2G21490.1	DEHYDRIN LEA (LEA)
AT2G21640.1	protein of unknown function that is a marker for oxidative stress
AT2G21660.1	GLYCINE-RICH RNA-BINDING PROTEIN 7 (GRP7)
AT2G21940.4	SHIKIMATE KINASE 1 (SK1)
AT2G21970.1	STRESS ENHANCED PROTEIN 2 (SEP2)
AT2G22420.1	Peroxidase superfamily protein
AT2G23150.1	ATNRAMP3
AT2G23673.1	Pseudogene of AT2G23680; stress-responsive protein
AT2G23680.1	Cold acclimation protein WCOR413 family
AT2G24370.1	Serine/threonine-protein kinase, active site:IPR008271(1)
AT2G24800.1	Peroxidases heam-ligand binding site
AT2G25140.1	CASEIN LYTIC PROTEINASE B4 (CLPB4)
AT2G25940.1	ALPHA-VACUOLAR PROCESSING ENZYME (ALPHA-VPE)
AT2G26150.1	HEAT SHOCK TRANSCRIPTION FACTOR A2 (HSFA2)
AT2G26740.1	SOLUBLE EPOXIDE HYDROLASE (SEH)
AT2G28160.1	FIT1
AT2G30250.1	WRKY DNA-BINDING PROTEIN 25 (WRKY25)
AT2G30580.1	DREB2A-INTERACTING PROTEIN 2 (DRIP2)
AT2G31320.1	POLY(ADP-RIBOSE) POLYMERASE 2 (PARP2)
AT2G31470.1	DROUGHT TOLERANCE REPRESSOR (DOR)
AT2G31610.1	Ribosomal protein S3, eukaryotic/archaeal
AT2G31660.1	SUPER SENSITIVE TO ABA AND DROUGHT2 (SAD2)
AT2G31670.1	Stress responsive alpha-beta barrel domain protein
AT2G31870.1	SANSKRIT FOR 'BRIGHT' (TEJ)
AT2G32270.1	ZIP3
AT2G32273.1	MICRORNA417 (MIR417)
AT2G32500.1	Stress responsive alpha-beta barrel domain protein
AT2G32920.1	PDI-LIKE 2-3 (PDIL2-3)
AT2G33210.1	HEAT SHOCK PROTEIN 60-2 (HSP60-2)
AT2G33380.1	RESPONSIVE TO DESSICATION 20 (RD20)
AT2G33540.1	C-TERMINAL DOMAIN PHOSPHATASE-LIKE 3 (CPL3)
AT2G34060.1	Peroxidases heam-ligand binding site
AT2G34250.1	SecY protein transport family protein
AT2G35380.1	Peroxidases heam-ligand binding site
AT2G35930.1	PLANT U-BOX 23 (PUB23)
AT2G36450.1	HARDY (HRD)
AT2G36460.1	Aldolase superfamily protein
AT2G37330.1	ALS3
AT2G37760.2	ALDO-KETO REDUCTASE FAMILY 4 MEMBER C8 (AKR4C8)
AT2G37770.2	CHLOROPLASTIC ALDO-KETO REDUCTASE (ChlAKR)
AT2G37925.1	COPT4
AT2G38210.1	PUTATIVE PDX1-LIKE PROTEIN 4 (PDX1L4)
AT2G38240.1	Oxoglutarate/iron-dependent oxygenase:IPR005123(1)
AT2G38380.1	Haem peroxidase, plant/fungal/bacterial
AT2G38390.1	Peroxidases heam-ligand binding site:IPR019793(1)
AT2G38470.1	WRKY DNA-BINDING PROTEIN 33 (WRKY33)
AT2G38530.1	LIPID TRANSFER PROTEIN 2 (LTP2)
AT2G38710.1	cellular_component unknown
AT2G39040.1	Peroxidases heam-ligand binding site:IPR019793(1)
AT2G39800.1	DELTA1-PYRROLINE-5-CARBOXYLATE SYNTHASE 1 (P5CS1)
AT2G39810.1	HIGH EXPRESSION OF OSMOTICALLY RESPONSIVE GENES 1 (HOS1)
AT2G40190.1	LEAF WILTING 3 (LEW3)
AT2G40300.1	FERRITIN 4 (FER4)
AT2G40880.1	CYSTATIN A (CYSA)
AT2G40950.1	BZIP17
AT2G41010.1	CALMODULIN (CAM)-BINDING PROTEIN OF 25 KDA (CAMBP25)
AT2G41430.1	EARLY RESPONSIVE TO DEHYDRATION 15 (ERD15)
AT2G41430.1	LIGHT STRESS RESPONSE DEFICIENT 1 (LSR1)
AT2G41480.1	Peroxidases heam-ligand binding site:IPR019793(1)
AT2G41690.1	HEAT SHOCK TRANSCRIPTION FACTOR B3 (HSFB3)
AT2G41900.1	Ankyrin repeat-containing domain:IPR020683(3)
AT2G42540.2	COLD-REGULATED 15A (COR15A)
AT2G43000.1	NAC DOMAIN CONTAINING PROTEIN 42 (NAC042)
AT2G43090.1	IPMI SSU1, ISOPROPYLMALATE ISOMERASE SMALL SUBUNIT 1
AT2G43350.1	GLUTATHIONE PEROXIDASE 3 (GPX3)
AT2G43480.1	Peroxidase superfamily protein
AT2G43620.1	Chitinase family protein
AT2G43790.1	MAP KINASE 6 (MPK6)
AT2G44060.1	Late embryogenesis abundant protein, LEA-14
AT2G44240.1	Unknown Function (DUF239)
AT2G45640.1	SIN3 ASSOCIATED POLYPEPTIDE P18 (SAP18)
AT2G45910.1	Serine/threonine-protein kinase, active site:IPR008271(1)
AT2G46140.1	Water stress and hypersensitive response domain:IPR013990(1)
AT2G46240.1	BCL-2-ASSOCIATED ATHANOGENE 6 (BAG6)
AT2G46800.1	MTP1
AT2G47180.1	GALACTINOL SYNTHASE 1 (GolS1)
AT2G47470.1	UNFERTILIZED EMBRYO SAC 5 (UNE5)
AT2G47710.1	Adenine nucleotide alpha hydrolases-like superfamily protein
AT2G47770.1	TSPO(OUTER MEMBRANE TRYPTOPHAN-RICH SENSORY PROTEIN)-RELATED (TSPO)
AT3G01190.1	Peroxidases heam-ligand binding site:IPR019793(1)
AT3G01420.1	DOX1
AT3G01520.1	Universal stress protein A-like protein
AT3G01650.1	RING DOMAIN LIGASE1 (RGLG1)
AT3G02140.1	TWO OR MORE ABRES-CONTAINING GENE 2 (TMAC2)
AT3G02360.2	6-PHOSPHOGLUCONATE DEHYDROGENASE 2, PGD2
AT3G02990.1	HEAT SHOCK TRANSCRIPTION FACTOR A1E (HSFA1E)
AT3G03270.1	HRU1, HYPOXIA RESPONSIVE UNIVERSAL STRESS PROTEIN 1
AT3G03290.1	Rossmann-like alpha/beta/alpha sandwich fold:IPR014729(1)
AT3G03450.1	RGA-LIKE 2 (RGL2)
AT3G03520.1	NON-SPECIFIC PHOSPHOLIPASE C3 (NPC3)
AT3G03670.1	Peroxidases heam-ligand binding site:IPR019793(1)
AT3G05880.1	RARE-COLD-INDUCIBLE 2A (RCI2A)
AT3G06010.1	ATCHR12
AT3G06050.1	PEROXIREDOXIN IIF (PRXIIF)
AT3G07020.2	STEROL GLUCOSYLTRANSFERASE (SGT)
AT3G07370.1	CARBOXYL TERMINUS OF HSC70-INTERACTING PROTEIN (CHIP)
AT3G07770.1	HEAT SHOCK PROTEIN 89.1 (Hsp89.1)
AT3G08730.1	PROTEIN-SERINE KINASE 1 (PK1)
AT3G08760.1	ATSIK
AT3G08850.1	RAPTOR/KOG1 homologs
AT3G08970.1	ATERDJ3A
AT3G09390.1	MT2A
AT3G10020.1	unknown protein
AT3G10800.1	BZIP28
AT3G11050.1	FERRITIN 2 (FER2)
AT3G11250.1	Ribosomal protein L10/acidic P0:IPR001790(1)
AT3G11480.1	BSMT1
AT3G11930.3	Rossmann-like alpha/beta/alpha sandwich
AT3G12050.1	ATPase activator activity, chaperone binding
AT3G12390.1	Nascent polypeptide-associated complex, alpha subunit
AT3G12490.2	CYSTATIN B (CYSB)
AT3G12630.1	STRESS ASSOCIATED PROTEIN 5 (SAP5)
AT3G12750.1	ZIP1
AT3G13470.1	CHAPERONIN-60BETA2 (CPN60BETA2)
AT3G14430.1	unknown protein
AT3G15170.1	CUP-SHAPED COTYLEDON1 (CUC1)
AT3G16670.1	Pollen Ole e 1 allergen and extensin family protein
AT3G16770.1	member of the ERF (ethylene response factor)
AT3G16890.1	mitochondrial pentatricopeptide repeat (PPR) domain protein
AT3G17020.1	Adenine nucleotide alpha hydrolases-like superfamily protein
AT3G17070.1	Peroxidase superfamily protein
AT3G18440.1	AtALMT9
AT3G19290.1	bZIP transcription factor
AT3G19760.1	RNA helicase, DEAD-box type, Q motif
AT3G20200.1	Serine/threonine-protein kinase, active site:IPR008271(1)
AT3G20340.1	unknown protein
AT3G21210.1	Rossmann-like alpha/beta/alpha sandwich fold:IPR014729(1)
AT3G21620.1	ERD (early-responsive to dehydration stress) family protein
AT3G21770.1	Peroxidase superfamily protein
AT3G22310.1	DEAD-box RNA helicases
AT3G22830.1	Heat Stress Transcription Factor (Hsf) family
AT3G23400.1	Plastid lipid-associated protein/fibrillin conserved domain
AT3G23570.1	alpha/beta-Hydrolases superfamily protein
AT3G23600.1	alpha/beta-Hydrolases superfamily protein
AT3G23830.1	glycine-rich RNA binding protein
AT3G24500.1	multiprotein bridging factor 1
AT3G24520.1	heat stress transcription factor C-1
AT3G25530.1	3-hydroxyacid dehydrogenase/reductase
AT3G25930.1	Adenine nucleotide alpha hydrolases-like superfamily protein
AT3G26520.1	gamma tonoplast intrinsic protein 2 (TIP2)
AT3G26744.1	Helix-loop-helix DNA-binding
AT3G28200.1	Peroxidase superfamily protein
AT3G28210.1	Zinc finger, AN1-type:IPR000058(8)
AT3G28220.1	TRAF-like family protein
AT3G30775.1	Proline oxidase:IPR015659(1)
AT3G32980.1	Peroxidases heam-ligand binding site:IPR019793(1)
AT3G42570.1	Haem peroxidase:IPR010255(1)
AT3G44340.1	Protein transport protein Sec24-like
AT3G44380.1	Late embryogenesis abundant (LEA) hydroxyproline-ric
AT3G45410.1	receptor-like kinase that has serine/threonine kinase activity
AT3G45640.1	Serine/threonine-protein kinase-like domain:IPR017442(1)
AT3G46550.1	Fasciclin-like arabinogalactan family protein
AT3G46620.1	ABA- and drought-induced RING-DUF1117
AT3G46900.1	COPT2
AT3G46960.1	DExD⁄H box RNA helicase
AT3G47390.1	Bacterial bifunctional deaminase-reductase
AT3G47450.1	protein with similarity to the bacterial YqeH GTPase
AT3G47550.1	protein binding, zinc ion binding
AT3G47950.1	ATPase, P-type, cytoplasmic transduction domain A
AT3G48170.1	Aldehyde/histidinol dehydrogenase:IPR016161(1)
AT3G48360.1	E3 ubiquitin-protein ligase complex (CUL3-RBX1-BTB)
AT3G49160.1	pyruvate kinase family protein
AT3G50260.1	member of the DREB subfamily A-5 of ERF/AP2 transcription factor family
AT3G50310.1	Serine/threonine-protein kinase-like domain
AT3G50500.1	Serine/threonine-protein kinase-like
AT3G50980.1	dehydrin xero 1 (XERO1)
AT3G51780.1	Arabidopsis BAG (Bcl-2-associated athanogene) protein
AT3G51910.1	Heat Stress Transcription Factor (Hsf) family
AT3G51920.1	CAM9 (CALMODULIN 9); calcium ion binding
AT3G51960.1	Basic-leucine zipper (bZIP) transcription factor
AT3G52300.1	ATPase, F0 complex, subunit D, mitochondrial
AT3G52450.1	cytoplasmically localized U-box domain E3 ubiquitin ligase
AT3G52560.1	ubiquitin E2 variant 1D-4 (UEV1D-4)
AT3G52930.1	Aldolase-type TIM barrel:IPR013785(1)
AT3G53110.1	DEAD-Box RNA Helicase
AT3G53770.1	late embryogenesis abundant 3 (LEA3) family protein
AT3G53870.1	Ribosomal protein S3, eukaryotic/archaeal
AT3G53990.1	Rossmann-like alpha/beta/alpha sandwich fold:IPR014729(1)
AT3G54510.1	Domain of unknown function DUF221
AT3G54900.1	Thioredoxin-like fold:IPR012336(1)
AT3G54960.1	protein disulfide isomerase-like (PDIL)
AT3G55270.1	MAP kinase phosphatase 1 (MKP1)
AT3G57190.1	Peptide chain release factor class I/class II
AT3G58450.1	Rossmann-like alpha/beta/alpha sandwich fold:IPR014729(1)
AT3G58810.1	MTP3
AT4G12040.1	Zinc finger A20 and AN1 domain-containing
AT4G13980.1	Heat Stress Transcription Factor (Hsf) family
AT4G14880.1	ATCYS-3A
AT4G15430.1	ERD (early-responsive to dehydration stress) family protein
AT4G15910.1	Late embryogenesis abundant protein
AT4G16260.1	putative beta-1,3-endoglucanase
AT4G16270.1	Peroxidases heam-ligand binding site:IPR019793(1)
AT4G16760.1	medium to long-chain acyl-CoA oxidase
AT4G17040.1	serine-type endopeptidase
AT4G17070.1	peptidyl-prolyl cis-trans isomerases
AT4G17260.1	Lactate/malate dehydrogenase family protein
AT4G17340.1	Aquaporins and small neutral solute transporters
AT4G17615.1	calcineurin B-like protein 1
AT4G17690.1	Peroxidases heam-ligand binding site:IPR019793(1)
AT4G18780.1	Cellulose synthase A catalytic subunit 8
AT4G18880.1	Heat Stress Transcription Factor(Hsf) family
AT4G19680.2	IRT2
AT4G19690.2	IRT1
AT4G19810.1	Class V chitinase that is a part of glycoside hydrolase
AT4G20830.1	Berberine/berberine-like:IPR012951(1)
AT4G21320.1	Aldolase-type TIM barrel family protein
AT4G21440.1	MYB-LIKE 102 (MYB102)
AT4G21510.1	F-box family protein
AT4G22120.1	unknown function DUF221
AT4G23400.1	PLASMA MEMBRANE INTRINSIC PROTEIN 1;5 (PIP1;5)
AT4G23670.1	Polyketide cyclase/dehydrase and lipid transport superfamily protein
AT4G24020.1	NIN LIKE PROTEIN 7 (NLP7)
AT4G24230.6	ACYL-COA-BINDING DOMAIN 3 (ACBP3)
AT4G24275.1	screen for stress-responsive genes
AT4G24460.1	CRT (CHLOROQUINE-RESISTANCE TRANSPORTER)-LIKE TRANSPORTER 2 (CLT2)
AT4G24960.1	HVA22 HOMOLOGUE D (HVA22D)
AT4G25130.1	PEPTIDE MET SULFOXIDE REDUCTASE 4 (PMSR4)
AT4G25160.1	Serine/threonine-protein kinase, active site:IPR008271(1)
AT4G25380.1	STRESS-ASSOCIATED PROTEIN 10 (SAP10)
AT4G25980.1	Peroxidases heam-ligand binding site:IPR019793(1)
AT4G26010.1	Peroxidase, active site:IPR019794(1)
AT4G26070.2	MAP KINASE/ ERK KINASE 1 (MEK1)
AT4G26288.1	function unknown
AT4G26970.1	ACONITASE 2 (ACO2)
AT4G27080.2	PDI-LIKE 5-4 (PDIL5-4)
AT4G27320.1	Rossmann-like alpha/beta/alpha sandwich fold
AT4G27400.1	Late embryogenesis abundant (LEA) protein-related
AT4G27560.1	UDP-Glycosyltransferase superfamily protein
AT4G28680.2	L-TYROSINE DECARBOXYLASE (TYRDC)
AT4G29810.2	MAP KINASE KINASE 2 (MKK2)
AT4G30110.1	HMA2
AT4G30120.1	HMA3
AT4G30170.1	Peroxidases heam-ligand binding site:IPR019793(1
AT4G30650.1	Low temperature and salt responsive protein family
AT4G30870.1	MMS AND UV SENSITIVE 81 (MUS81)
AT4G30920.1	LEUCYL AMINOPEPTIDASE 2 (LAP2)
AT4G31230.1	Serine/threonine-protein kinase-like domain:IPR017442(1)
AT4G31760.1	Peroxidases heam-ligand binding site:IPR019793(1)
AT4G32770.1	VITAMIN E DEFICIENT 1 (VTE1)
AT4G32940.1	GAMMA VACUOLAR PROCESSING ENZYME (GAMMA-VPE)
AT4G33020.1	ZIP9
AT4G33420.1	Haem peroxidase:IPR010255(1)
AT4G33520.2	HMA6
AT4G33870.1	Peroxidase, active site:IPR019794(1)
AT4G33950.1	OPEN STOMATA 1 (OST1)
AT4G34000.1	ABSCISIC ACID RESPONSIVE ELEMENTS-BINDING FACTOR 3 (ABF3)
AT4G34180.1	Putative cyclase:IPR007325(1)
AT4G34190.1	STRESS ENHANCED PROTEIN 1 (SEP1)
AT4G34710.1	ARGININE DECARBOXYLASE 2 (ADC2)
AT4G35100.1	PLASMA MEMBRANE INTRINSIC PROTEIN 3 (PIP3)
AT4G35300.1	TONOPLAST MONOSACCHARIDE TRANSPORTER2 (TMT2)
AT4G35830.1	ACONITASE 1 (ACO1)
AT4G35870.1	early-responsive to dehydration stress protein (ERD4)
AT4G35930.1	F-box family protein
AT4G36040.1	DNAJ11 (J11)
AT4G36250.1	ALDEHYDE DEHYDROGENASE 3F1 (ALDH3F1)
AT4G37270.1	HMA1
AT4G37530.1	Peroxidases heam-ligand binding site:IPR019793(1)
AT4G37910.1	MITOCHONDRIAL HEAT SHOCK PROTEIN 70-1 (mtHsc70-1)
AT4G37930.1	SERINE TRANSHYDROXYMETHYLTRANSFERASE 1 (SHM1)
AT4G38410.1	Dehydrin:IPR000167(4)
AT4G39130.1	Dehydrin family protein
AT4G39260.1	CIRCADIAN RHYTHM, AND RNA BINDING 1 (CCR1)
AT4G39640.1	GAMMA-GLUTAMYL TRANSPEPTIDASE 1 (GGT1)
AT4G40010.1	SNF1-RELATED PROTEIN KINASE 2.7 (SNRK2.7)
AT5G01270.2	CARBOXYL-TERMINAL DOMAIN (CTD) PHOSPHATASE-LIKE 2 (CPL2)
AT5G01490.1	CATION EXCHANGER 4 (CAX4)
AT5G01600.1	FERRETIN 1 (FER1)
AT5G02380.1	MT2B
AT5G02410.1	HOMOLOG OF YEAST ALG10 (ALG10)
AT5G03630.1	Pyridine nucleotide-disulphide oxidoreductase, NAD-binding domain
AT5G03720.1	HEAT SHOCK TRANSCRIPTION FACTOR A3 (HSFA3)
AT5G03740.1	HISTONE DEACETYLASE 2C (HD2C)
AT5G05340.1	NAD-dependent glyceraldehyde 3-phosphate dehydrogenase
AT5G05410.1	DRE-BINDING PROTEIN 2A (DREB2A)
AT5G05600.1	Oxoglutarate/iron-dependent oxygenase:IPR005123(1
AT5G05690.1	CONSTITUTIVE PHOTOMORPHOGENIC DWARF (CPD)
AT5G06730.1	Haem peroxidase:IPR010255(1)
AT5G07220.1	BCL-2-ASSOCIATED ATHANOGENE 3 (BAG3)
AT5G07350.2	TUDOR-SN PROTEIN 1 (TUDOR1)
AT5G08590.1	SNF1-RELATED PROTEIN KINASE 2.1 (SNRK2.1)
AT5G08620.1	STRESS RESPONSE SUPPRESSOR 2 (STRS2)
AT5G09540.1	Heat shock protein DnaJ, N-terminal:IPR001623(5)
AT5G09690.2	MAGNESIUM TRANSPORTER 7 (MGT7)
AT5G10450.4	G-BOX REGULATING FACTOR 6 (GRF6)
AT5G12000.1	Protein kinase protein with adenine nucleotide alpha hydrolases-like
AT5G12010.1	unknown protein
AT5G12030.1	HEAT SHOCK PROTEIN 17.6A (HSP17.6A)
AT5G12170.2	CRT (CHLOROQUINE-RESISTANCE TRANSPORTER)-LIKE TRANSPORTER 3 (CLT3)
AT5G12380.1	ANNEXIN 8 (ANNAT8)
AT5G13080.1	WRKY DNA-BINDING PROTEIN 75 (WRKY75)
AT5G13650.2	SUPPRESSOR OF VARIEGATION 3 (SVR3)
AT5G13740.1	ZIF1
AT5G13850.1	NASCENT POLYPEPTIDE-ASSOCIATED COMPLEX SUBUNIT ALPHA-LIKE PROTEIN 3 (NACA3)
AT5G14130.1	Peroxidases heam-ligand binding site:IPR019793(1).
AT5G14420.1	RING DOMAIN LIGASE2 (RGLG2)
AT5G14545.1	MICRORNA398B (MIR398B)
AT5G14565.1	MICRORNA398C (MIR398C)
AT5G14640.1	SHAGGY-LIKE KINASE 13 (SK13)
AT5G14680.1	Adenine nucleotide alpha hydrolases-like superfamily protein
AT5G15180.1	Peroxidase superfamily protein
AT5G15450.1	CASEIN LYTIC PROTEINASE B3 (CLPB3)
AT5G16820.1	HEAT SHOCK FACTOR 3 (HSF3)
AT5G16960.1	Alcohol dehydrogenase superfamily, zinc-type:IPR002085(1)
AT5G16980.2	2-HEXADECENAL-REDUCTASE-RXN (1.3.1.27)
AT5G16990.1	Alcohol dehydrogenase, C-terminal:IPR013149(1).
AT5G17000.1	Alcohol dehydrogenase superfamily, zinc-type:IPR002085(1)
AT5G17310.2	UDP-GLUCOSE PYROPHOSPHORYLASE 2 (UGP2)
AT5G17390.1	Adenine nucleotide alpha hydrolases-like superfamily protein
AT5G17460.2	unknown protein
AT5G17820.1	Peroxidases heam-ligand binding site:IPR019793(1)
AT5G18820.1	CHAPERONIN-60ALPHA2 (CPN60ALPHA2)
AT5G19380.2	CRT (CHLOROQUINE-RESISTANCE TRANSPORTER)-LIKE TRANSPORTER 1 (CLT1)
AT5G19660.1	SITE-1 PROTEASE (S1P)
AT5G19875.1	unknown protein
AT5G19880.1	Peroxidase superfamily protein
AT5G19890.1	Peroxidases heam-ligand binding site:IPR019793(1)
AT5G20080.1	Ferredoxin reductase-type FAD-binding domain:IPR017927(1)
AT5G20230.1	BLUE-COPPER-BINDING PROTEIN (BCB)
AT5G20310.1	inase protein with adenine nucleotide alpha hydrolases-like domain
AT5G20650.1	COPT5
AT5G21930.1	HMA8
AT5G22410.1	ROOT HAIR SPECIFIC 18 (RHS18)
AT5G22580.1	Dimeric alpha-beta barrel:IPR011008(1)
AT5G23540.1	ubiquitin-dependent protein catabolic process
AT5G24070.1	Peroxidases heam-ligand binding site:IPR019793(1).
AT5G24090.1	CHITINASE A (CHIA)
AT5G24270.1	SALT OVERLY SENSITIVE 3 (SOS3)
AT5G26030.1	FERROCHELATASE 1 (FC1)
AT5G26150.1	Serine/threonine-protein kinase-like domain:IPR017442(1)
AT5G27830.4	unknown protein
AT5G35380.1	protein kinase family protein
AT5G35530.1	Ribosomal protein S3, eukaryotic/archaeal:IPR005703(1)
AT5G37770.1	protein with 40% similarity to calmodulin. Binds Ca(2+)
AT5G37940.1	Alcohol dehydrogenase superfamily, zinc-type:IPR002085(1).
AT5G37980.1	Alcohol dehydrogenase superfamily, zinc-type:IPR002085(1)
AT5G38000.1	Alcohol dehydrogenase superfamily, zinc-type:IPR002085(1)
AT5G38940.1	manganese ion binding, nutrient reservoir activity
AT5G39040.1	ALS1
AT5G39610.1	NAC DOMAIN CONTAINING PROTEIN 6 (NAC6)
AT5G39730.1	Butirosin biosynthesis, BtrG-like:IPR013024(1)
AT5G40150.1	Haem peroxidase:IPR010255(1)
AT5G42180.1	Peroxidases heam-ligand binding site:IPR019793(1)
AT5G43060.1	Peptidase C1A, papain:IPR013128(1)
AT5G43750.1	PHOTOSYNTHETIC NDH SUBCOMPLEX B 5 (PnsB5)
AT5G43840.1	HEAT SHOCK TRANSCRIPTION FACTOR A6A (HSFA6A)
AT5G44070.1	PHYTOCHELATIN SYNTHASE 1 (PCS1)
AT5G44380.1	FAD linked oxidase, N-terminal:IPR006094(1)
AT5G44650.1	CHLOROPLAST PROTEIN-ENHANCING STRESS TOLERANCE (CEST)
AT5G44790.1	HMA7
AT5G45710.1	ROOT HANDEDNESS 1 (RHA1)
AT5G46180.1	ORNITHINE-DELTA-AMINOTRANSFERASE (DELTA-OAT)
AT5G46830.1	NACL-INDUCIBLE GENE 1 (NIG1)
AT5G47000.1	xylan 1,4-beta-xylosidase activity, peroxidase activity
AT5G47330.1	alpha/beta-Hydrolases superfamily protein
AT5G47650.1	NUDIX HYDROLASE HOMOLOG 2 (NUDT2)
AT5G47740.2	Adenine nucleotide alpha hydrolases-like superfamily protein
AT5G48870.1	SUPERSENSITIVE TO ABA AND DROUGHT 1 (SAD1)
AT5G49050.1	alpha hydrolases-like superfamily protein
AT5G49450.1	BASIC LEUCINE-ZIPPER 1 (bZIP1)
AT5G49520.1	WRKY DNA-BINDING PROTEIN 48 (WRKY48)
AT5G50350.1	unknown protein
AT5G50720.1	HVA22 HOMOLOGUE E (HVA22E)
AT5G51950.1	Glucose-methanol-choline oxidoreductase, C-terminal:IPR007867(1)
AT5G51990.1	C-REPEAT-BINDING FACTOR 4 (CBF4)
AT5G52060.1	BCL-2-ASSOCIATED ATHANOGENE 1 (BAG1)
AT5G54070.1	HEAT SHOCK TRANSCRIPTION FACTOR A9 (HSFA9)
AT5G54430.1	Protein is phosphorylated in response to Phytophthora infestans zoospores
AT5G55070.1	Dihydrolipoamide succinyltransferase:IPR006255(1)
AT5G56000.1	HEAT SHOCK PROTEIN 81.4 (Hsp81.4)
AT5G56500.1	CHAPERONIN-60BETA3 (CPN60BETA3)
AT5G56550.1	OXIDATIVE STRESS 3 (OXS3)
AT5G57035.1	Serine/threonine-protein kinase, active site:IPR008271(1)
AT5G58270.1	AtATM3
AT5G58390.1	Peroxidases heam-ligand binding site:IPR019793(1)
AT5G58400.1	Peroxidase, active site:IPR019794(1).
AT5G58560.1	FARNESOL KINASE (FOLK)
AT5G58670.1	PHOSPHOLIPASE C1 (PLC1)
AT5G59030.1	COPT1
AT5G59040.1	COPT3
AT5G59080.1	unknown protein
AT5G59520.1	ZIP2
AT5G59550.1	RDUF2
AT5G60640.1	PDI-LIKE 1-4 (PDIL1-4)
AT5G61560.1	Tyrosine-protein kinase, catalytic domain:IPR020635(1).
AT5G61750.1	Germin, manganese binding site:IPR019780(1)
AT5G61820.1	Stress up-regulated Nod 19:IPR011692(1)
AT5G62020.1	HEAT SHOCK TRANSCRIPTION FACTOR B2A (HSFB2A)
AT5G62100.1	BCL-2-ASSOCIATED ATHANOGENE 2 (BAG2)
AT5G62350.1	Pectinesterase inhibitor:IPR006501(5)
AT5G62390.1	BCL-2-ASSOCIATED ATHANOGENE 7 (BAG7)
AT5G62470.2	MYB DOMAIN PROTEIN 96 (MYB96)
AT5G62490.1	HVA22 HOMOLOGUE B (HVA22B)
AT5G62520.1	SIMILAR TO RCD ONE 5 (SRO5)
AT5G62530.1	ALDEHYDE DEHYDROGENASE 12A1 (ALDH12A1)
AT5G63310.1	NUCLEOSIDE DIPHOSPHATE KINASE 2 (NDPK2)
AT5G63650.1	SNF1-RELATED PROTEIN KINASE 2.5 (SNRK2.5)
AT5G63790.1	NAC DOMAIN CONTAINING PROTEIN 102 (NAC102)
AT5G63940.1	Protein kinase protein with adenine nucleotide alpha hydrolases-like
AT5G63980.1	bifunctional protein that has 3'(2'),5'-bisphosphate nucleotidase and inositol polyphosphate 1-phosphatase activities
AT5G64100.1	Peroxidase superfamily protein
AT5G64110.1	Peroxidase, active site:IPR019794(1)
AT5G64510.1	TUNICAMYCIN INDUCED 1 (TIN1)
AT5G64620.1	CELL WALL / VACUOLAR INHIBITOR OF FRUCTOSIDASE 2 (C/VIF2)
AT5G64750.1	ABA REPRESSOR1 (ABR1)
AT5G64940.1	ABC2 HOMOLOG 13 (ATH13)
AT5G66390.1	Peroxidases heam-ligand binding site:IPR019793(1)
AT5G66880.1	SUCROSE NONFERMENTING 1(SNF1)-RELATED PROTEIN KINASE 2.3 (SNRK2.3)
AT5G67030.1	ABA DEFICIENT 1 (ABA1)
AT5G67320.1	HIGH EXPRESSION OF OSMOTICALLY RESPONSIVE GENES 15 (HOS15)
AT5G67330.1	ATNRAMP4
AT5G67400.1	ROOT HAIR SPECIFIC 19 (RHS19)
