# Supplementary material for: Stress responses of the oil-producing green microalga Botryococcus braunii Race B
Source: PeerJ. 2016 Dec 6;4:e2748. doi: 10.7717/peerj.2748 (PMC5144741; doi:10.7717/peerj.2748)
Supplement: Table S4 — This program looks for a set of core universally conserved genes and analyzes if there are complete coding sequences for these genes. Our data set is compared to several other algae and Arabidopsis. Although results are not the best, we consider they are suitable to validate the results. [file peerj-04-2748-s009.xlsx]

## Sheet: Sheet1
Species	At	Bb	Cr	Cs	Cv	Vc
Complete BUSCOs	384	173	352	329	302	318				Species Codes
Fragmented BUSCOs	7	125	15	34	53	35				Short	Long
Missing BUSCOs	38	131	62	66	74	76				At	Arabidopsis thaliana
										Bb	Botryococcus braunii
										Cr	Chlamydomonas reinhardtii
										Cs	Coccomyxa subellipsoidea
										Cv	Chlorella variabilis
										Vc	Volvox carteri
